# Supplementary material for: Long-term prognosis in patients with end-stage renal disease after coronary artery bypass grafting
Source: PubMed Central journal article supplement — J Thorac Dis. 2020 Nov;12(11):6722–30. doi: 10.21037/jtd-20-2046 (PMC7711392; doi:10.21037/jtd-20-2046), 2020-11
Supplement: jtd-12-11-6722-dss.pdf [file jtd-12-11-6722-dss.pdf]

## Data Sharing Statement

|                     |                                                                                                                                                    |                                                                                                                                                           |
|---------------------|----------------------------------------------------------------------------------------------------------------------------------------------------|-----------------------------------------------------------------------------------------------------------------------------------------------------------|
| <b>Article Info</b> | http://dx.doi.org/10.21037/jtd-20-2046.                                                                                                            |                                                                                                                                                           |
| <b>Item</b>         | <b>Question</b>                                                                                                                                    | <b>Authors' Response<br/>(place "-" if not applicable)</b>                                                                                                |
| 1                   | Would you like to share data collected for your study to others?                                                                                   | Yes.                                                                                                                                                      |
| 2                   | If not, would you like to share the reason for your decision?                                                                                      | -                                                                                                                                                         |
| 3                   | What data in particular will be shared?                                                                                                            | Survival data of patients with end-stage renal disease undergoing isolated coronary artery bypass grafting.                                               |
| 4                   | Any other documents will be share? Such as study protocol, statistical analysis plan, informed consent form, clinical study report, analytic code. | No.                                                                                                                                                       |
| 5                   | When will data availability begin?                                                                                                                 | From the publication date.                                                                                                                                |
| 6                   | When will data availability end?                                                                                                                   | 5 Feb 2021 (expiry date of IRB approval).                                                                                                                 |
| 7                   | To whom will you share the data?                                                                                                                   | Cardiothoracic surgeons interested in the survival outcomes of patients with end-stage renal disease undergoing isolated coronary artery bypass grafting. |
| 8                   | For what type of analysis or purpose?                                                                                                              | To study the long-term outcomes of patients with end-stage renal disease undergoing isolated coronary artery bypass grafting.                             |
| 9                   | How or where can the data/documents be obtained?                                                                                                   | Requests can be sent to philip.pang.y.k@singhealth.com.sg.                                                                                                |
| 10                  | Any other restrictions?                                                                                                                            | Each request will be considered individually to balance the potential benefits and risks of sharing data.                                                 |
